# Supplementary material
Source: PubMed Central journal article supplement (PMC4194268)
Supplement: NIHMS619284-supplement-S1.pdf [file NIHMS619284-supplement-S1.pdf]

| Term information                               |          |                                                      |                                        | FAERS Results |            |          |      |
|------------------------------------------------|----------|------------------------------------------------------|----------------------------------------|---------------|------------|----------|------|
| AEs                                            | PT code  | SOC                                                  | UMLS concept ID (linking to SNOMED CT) | Num_Cases     | Num_Female | num_Male | F/M  |
| abscess jaw                                    | 10053573 | infections and infestations                          | C0266963                               | 269           | 186        | 76       | 2.45 |
| abscess oral accommodation disorder            | 10000311 | infections and infestations                          | C0267003                               | 260           | 179        | 72       | 2.49 |
|                                                | 10000389 | eye disorders                                        | C0152198                               | 655           | 454        | 177      | 2.56 |
| acne                                           | 10000496 | skin and subcutaneous tissue disorders               | C0702166                               | 3243          | 2282       | 812      | 2.81 |
| acne cystic acquired immunodeficiency syndrome | 10000503 | skin and subcutaneous tissue disorders               | C0010666                               | 161           | 120        | 36       | 3.33 |
|                                                | 10000565 | infections and infestations                          | C0001175                               | 196           | 25         | 148      | 0.17 |
| actinomycosis                                  | 10000620 | infections and infestations                          | C0001261                               | 426           | 282        | 140      | 2.01 |
| adverse drug reaction                          | 10061623 | general disorders and administration site conditions | C0041755                               | 3886          | 2302       | 1136     | 2.03 |
| adverse reaction                               | 10067484 | general disorders and administration site conditions | C0559546                               | 465           | 264        | 129      | 2.05 |
| affect lability                                | 10054196 | psychiatric disorders                                | C0233472                               | 1781          | 1196       | 535      | 2.24 |
| agoraphobia alcohol withdrawal syndrome        | 10001502 | psychiatric disorders                                | C0001818                               | 353           | 246        | 104      | 2.37 |
|                                                | 10053164 | psychiatric disorders                                | C0236663                               | 281           | 82         | 195      | 0.42 |
| alopecia                                       | 10001760 | skin and subcutaneous tissue disorders               | C0002170                               | 23710         | 18980      | 3465     | 5.48 |
| anencephaly angle closure glaucoma             | 10002320 | nervous system disorders                             | C0002902                               | 218           | 85         | 13       | 6.54 |
|                                                | 10002500 | eye disorders                                        | C0017605                               | 734           | 542        | 168      | 3.23 |
| animal bite                                    | 10002515 | injury, poisoning and procedural complications       | C0003044                               | 317           | 218        | 85       | 2.56 |
| ankle fracture antiphospholipid syndrome       | 10002544 | musculoskeletal and connective tissue disorders      | C0159877                               | 2176          | 1696       | 445      | 3.81 |
|                                                | 10002817 | immune system disorders                              | C0085278                               | 300           | 204        | 89       | 2.29 |
| aortic valve incompetence                      | 10002915 | cardiac disorders                                    | C0003504                               | 2989          | 2017       | 919      | 2.19 |

|                                        |          |                                                                           |          |       |      |      |      |
|----------------------------------------|----------|---------------------------------------------------------------------------|----------|-------|------|------|------|
| aphonia                                | 10002953 | psychiatric disorders<br>general disorders and<br>administration site     | C0003564 | 1604  | 1126 | 430  | 2.62 |
| application site<br>dermatitis         | 10003036 | conditions<br>general disorders and<br>administration site                | C0521495 | 570   | 377  | 174  | 2.17 |
| application site<br>irritation         | 10003046 | conditions<br>general disorders and<br>administration site                | C0521490 | 2240  | 1560 | 555  | 2.81 |
| application site<br>rash               | 10003054 | conditions<br>general disorders and<br>administration site                | C0521495 | 1477  | 1040 | 391  | 2.66 |
| application site<br>reaction           | 10003055 | conditions<br>musculoskeletal and                                         | C0151505 | 2698  | 2279 | 369  | 6.18 |
| arthropathy                            | 10003285 | connective tissue disorders                                               | C0022408 | 5035  | 3285 | 1609 | 2.04 |
| asthenopia                             | 10003552 | eye disorders                                                             | C0004095 | 607   | 425  | 171  | 2.49 |
| asthma                                 | 10003553 | respiratory, thoracic and<br>mediastinal disorders                        | C0004096 | 10750 | 7131 | 3133 | 2.28 |
| autism                                 | 10003805 | nervous system disorders                                                  | C0004352 | 449   | 72   | 208  | 0.35 |
| autoimmune<br>disorder                 | 10061664 | immune system disorders                                                   | C0004364 | 883   | 557  | 277  | 2.01 |
| autoimmune<br>hepatitis                | 10003827 | immune system disorders                                                   | C0241910 | 1403  | 997  | 322  | 3.10 |
| autoimmune<br>thyroiditis              | 10049046 | immune system disorders                                                   | C0920350 | 475   | 342  | 106  | 3.23 |
| basedow's<br>disease                   | 10004161 | immune system disorders                                                   | C0018213 | 412   | 293  | 107  | 2.74 |
| benign breast<br>neoplasm              | 10004243 | neoplasms benign,<br>malignant and unspecified<br>(incl cysts and polyps) | C0346156 | 266   | 231  | 29   | 7.97 |
| benign<br>intracranial<br>hypertension | 10004277 | nervous system disorders                                                  | C0033845 | 943   | 630  | 244  | 2.58 |
| benign<br>neoplasm of<br>thyroid gland | 10004412 | endocrine disorders                                                       | C0154038 | 140   | 123  | 17   | 7.24 |
| biliary cirrhosis<br>primary           | 10004661 | immune system disorders                                                   | C0008312 | 241   | 196  | 36   | 5.44 |
| biliary colic                          | 10004663 | hepatobiliary disorders                                                   | C0151824 | 438   | 322  | 105  | 3.07 |
| biliary<br>dyskinesia                  | 10056529 | hepatobiliary disorders                                                   | C0005416 | 170   | 140  | 27   | 5.19 |
| binge eating                           | 10004716 | psychiatric disorders                                                     | C0596170 | 166   | 116  | 35   | 3.31 |
| bladder cancer                         | 10005003 | neoplasms benign,<br>malignant and unspecified<br>(incl cysts and polyps) | C0005684 | 1015  | 306  | 652  | 0.47 |

|                            |          |                                                                     |          |      |      |      |       |
|----------------------------|----------|---------------------------------------------------------------------|----------|------|------|------|-------|
| bladder disorder           | 10061011 | renal and urinary disorders                                         | C0005686 | 1616 | 1131 | 435  | 2.60  |
| bladder obstruction        | 10005060 | renal and urinary disorders                                         | C0005694 | 178  | 40   | 130  | 0.31  |
|                            |          | skin and subcutaneous                                               |          |      |      |      |       |
| blepharitis                | 10005148 | tissue disorders                                                    | C0005741 | 522  | 342  | 151  | 2.26  |
| blepharospasm              | 10005159 | eye disorders                                                       | C0005747 | 783  | 502  | 244  | 2.06  |
| blood calcium increased    | 10005396 | investigations                                                      | C0020437 | 1707 | 1188 | 468  | 2.54  |
|                            |          | musculoskeletal and                                                 |          |      |      |      |       |
| bone disorder              | 10005956 | connective tissue disorders                                         | C0005940 | 4409 | 2892 | 1408 | 2.05  |
|                            |          | neoplasms benign, malignant and unspecified (incl cysts and polyps) |          |      |      |      |       |
| breast cyst                | 10006220 | (incl cysts and polyps)                                             | C0006144 | 381  | 359  | 16   | 22.44 |
|                            |          | respiratory, thoracic and                                           |          |      |      |      |       |
| bronchitis                 | 10006451 | mediastinal disorders                                               | C0006277 | 8258 | 5509 | 2317 | 2.38  |
| bruxism                    | 10006514 | gastrointestinal disorders                                          | C0006325 | 1067 | 710  | 305  | 2.33  |
|                            |          | metabolism and nutrition                                            |          |      |      |      |       |
| bulimia nervosa            | 10006550 | disorders                                                           | C2267227 | 175  | 130  | 37   | 3.51  |
|                            |          | musculoskeletal and                                                 |          |      |      |      |       |
| bunion                     | 10006585 | connective tissue disorders                                         | C0006386 | 307  | 269  | 21   | 12.81 |
| carpal tunnel syndrome     | 10007697 | nervous system disorders                                            | C0007286 | 2312 | 1614 | 628  | 2.57  |
| cataract                   | 10007739 | eye disorders                                                       | C0086543 | 5899 | 3857 | 1839 | 2.10  |
| cerebral venous thrombosis | 10008138 | vascular disorders                                                  | C0151945 | 377  | 273  | 93   | 2.94  |
| chapped lips               | 10049047 | gastrointestinal disorders                                          | C0424489 | 683  | 441  | 212  | 2.08  |
|                            |          | skin and subcutaneous                                               |          |      |      |      |       |
| chloasma                   | 10008570 | tissue disorders                                                    | C0025218 | 254  | 235  | 13   | 18.08 |
| cholecystitis chronic      | 10008617 | hepatobiliary disorders                                             | C0085694 | 606  | 483  | 100  | 4.83  |
|                            |          | musculoskeletal and                                                 |          |      |      |      |       |
| chondropathy               | 10061762 | connective tissue disorders                                         | C0007302 | 439  | 302  | 125  | 2.42  |
|                            |          | respiratory, thoracic and                                           |          |      |      |      |       |
| chronic sinusitis          | 10009137 | mediastinal disorders                                               | C0149516 | 475  | 317  | 144  | 2.20  |
| cirrhosis alcoholic        | 10009208 | hepatobiliary disorders                                             | C0023891 | 134  | 28   | 102  | 0.27  |
| coeliac disease            | 10009839 | immune system disorders                                             | C0007570 | 1081 | 782  | 254  | 3.08  |

|                                                  |          |                                                                     |          |       |       |       |        |
|--------------------------------------------------|----------|---------------------------------------------------------------------|----------|-------|-------|-------|--------|
| colitis collagenous                              | 10048928 | gastrointestinal disorders                                          | C0238067 | 265   | 198   | 54    | 3.67   |
| colitis ischaemic complex regional pain syndrome | 10009895 | gastrointestinal disorders                                          | C0162529 | 2155  | 1489  | 575   | 2.59   |
|                                                  | 10064332 | nervous system disorders                                            | C0458219 | 289   | 210   | 69    | 3.04   |
| compression fracture                             | 10010214 | musculoskeletal and connective tissue disorders                     | C0521169 | 870   | 613   | 242   | 2.53   |
| concussion                                       | 10010254 | nervous system disorders                                            | C0006107 | 883   | 584   | 282   | 2.07   |
| connective tissue disorder                       | 10061087 | musculoskeletal and connective tissue disorders                     | C0009782 | 235   | 172   | 57    | 3.02   |
| constipation                                     | 10010774 | gastrointestinal disorders                                          | C0009806 | 35780 | 22880 | 11220 | 2.04   |
| contusion                                        | 10050584 | vascular disorders                                                  | C0009938 | 11390 | 7906  | 2991  | 2.64   |
| conversion disorder                              | 10010893 | psychiatric disorders                                               | C0009946 | 996   | 742   | 235   | 3.16   |
| corneal disorder                                 | 10061453 | eye disorders                                                       | C0010034 | 407   | 248   | 123   | 2.02   |
| costochondritis                                  | 10011219 | musculoskeletal and connective tissue disorders                     | C0040213 | 403   | 294   | 102   | 2.88   |
| cutaneous lupus erythematosus                    | 10056509 | skin and subcutaneous tissue disorders                              | C0024137 | 559   | 399   | 109   | 3.66   |
| cyst                                             | 10011732 | neoplasms benign, malignant and unspecified (incl cysts and polyps) | C0010709 | 1598  | 1083  | 467   | 2.32   |
| cystitis                                         | 10011781 | renal and urinary disorders                                         | C0010692 | 3717  | 2917  | 682   | 4.28   |
| cystitis interstitial                            | 10011796 | renal and urinary disorders                                         | C0282488 | 266   | 225   | 29    | 7.76   |
| cystocele                                        | 10011803 | renal and urinary disorders                                         | C0010695 | 217   | 213   | 1     | 213.00 |
| defaecation urgency                              | 10012110 | gastrointestinal disorders                                          | C0426636 | 828   | 537   | 250   | 2.15   |
| dental caries                                    | 10012318 | gastrointestinal disorders                                          | C0011334 | 2099  | 1474  | 541   | 2.72   |
| dependence                                       | 10012335 | psychiatric disorders                                               | C0439857 | 3035  | 2017  | 885   | 2.28   |
| dry mouth                                        | 10013781 | gastrointestinal disorders                                          | C0043352 | 18900 | 12700 | 5570  | 2.28   |
| dysgraphia                                       | 10058319 | nervous system disorders                                            | C0234144 | 831   | 558   | 253   | 2.21   |
| dyspepsia                                        | 10013946 | gastrointestinal disorders                                          | C0013395 | 20600 | 13330 | 6607  | 2.02   |
| dysphonia                                        | 10013952 | nervous system disorders                                            | C1527344 | 7281  | 4706  | 2302  | 2.04   |

|                                 |          |                                                                           |          |      |      |      |       |
|---------------------------------|----------|---------------------------------------------------------------------------|----------|------|------|------|-------|
| ear disorder                    | 10014004 | ear and labyrinth disorders                                               | C0013447 | 602  | 409  | 172  | 2.38  |
| ear infection                   | 10014011 | infections and infestations                                               | C0699744 | 1928 | 1214 | 580  | 2.09  |
| erythema<br>nodosum             | 10015226 | immune system disorders                                                   | C0014743 | 968  | 707  | 217  | 3.26  |
| exostosis                       | 10015688 | musculoskeletal and<br>connective tissue disorders                        | C1442903 | 1464 | 1014 | 399  | 2.54  |
| eye discharge                   | 10015915 | eye disorders                                                             | C0423006 | 990  | 652  | 295  | 2.21  |
| eye infection                   | 10015929 | infections and infestations                                               | C0015403 | 807  | 509  | 237  | 2.15  |
| eyelid disorder                 | 10061130 | skin and subcutaneous<br>tissue disorders                                 | C0015423 | 436  | 283  | 134  | 2.11  |
| eyelid oedema                   | 10015993 | immune system disorders                                                   | C0162285 | 4563 | 3037 | 1360 | 2.23  |
| eyelid ptosis                   | 10015995 | eye disorders                                                             | C0005745 | 1947 | 1224 | 589  | 2.08  |
| fanconi<br>syndrome<br>acquired | 10052607 | renal and urinary disorders                                               | C0341702 | 299  | 85   | 205  | 0.41  |
| femoral neck<br>fracture        | 10016450 | musculoskeletal and<br>connective tissue disorders                        | C0015806 | 900  | 635  | 244  | 2.60  |
| femur fracture                  | 10016454 | musculoskeletal and<br>connective tissue disorders                        | C0015802 | 3394 | 2765 | 480  | 5.76  |
| fibroadenoma of<br>breast       | 10016613 | neoplasms benign,<br>malignant and unspecified<br>(incl cysts and polyps) | C0178421 | 186  | 180  | 3    | 60.00 |
| fibrocystic<br>breast disease   | 10016621 | neoplasms benign,<br>malignant and unspecified<br>(incl cysts and polyps) | C0016034 | 483  | 461  | 15   | 30.73 |
| fibula fracture                 | 10016667 | musculoskeletal and<br>connective tissue disorders                        | C0149699 | 463  | 338  | 116  | 2.91  |
| finger deformity                | 10061156 | musculoskeletal and<br>connective tissue disorders                        | C0410740 | 285  | 185  | 66   | 2.80  |
| focal nodular<br>hyperplasia    | 10052285 | hepatobiliary disorders                                                   | C0333980 | 166  | 123  | 40   | 3.08  |
| food allergy                    | 10016946 | immune system disorders                                                   | C0016470 | 670  | 435  | 207  | 2.10  |
| foot fracture                   | 10016970 | musculoskeletal and<br>connective tissue disorders                        | C0272774 | 2138 | 1676 | 416  | 4.03  |
| fracture                        | 10017076 | musculoskeletal and<br>connective tissue disorders                        | C0016658 | 1705 | 1178 | 431  | 2.73  |

|                             |          |                                                 |          |      |      |      |        |
|-----------------------------|----------|-------------------------------------------------|----------|------|------|------|--------|
| fracture delayed union      | 10017081 | injury, poisoning and procedural complications  | C0332743 | 126  | 106  | 17   | 6.24   |
| fracture nonunion           | 10017088 | injury, poisoning and procedural complications  | C0016665 | 175  | 146  | 25   | 5.84   |
| fractured coccyx            | 10049164 | musculoskeletal and connective tissue disorders | C0149860 | 122  | 100  | 22   | 4.55   |
| fractured sacrum            | 10017308 | musculoskeletal and connective tissue disorders | C0435492 | 189  | 162  | 26   | 6.23   |
| fungal infection            | 10017533 | infections and infestations                     | C0026946 | 3611 | 2341 | 1032 | 2.27   |
| gallbladder cholesterolosis | 10017624 | hepatobiliary disorders                         | C0152456 | 109  | 95   | 12   | 7.92   |
| gallbladder injury          | 10017642 | hepatobiliary disorders                         | C0434028 | 710  | 690  | 5    | 138.00 |
| gallbladder non-functioning | 10017635 | hepatobiliary disorders                         | C0232770 | 206  | 185  | 17   | 10.88  |
| gallbladder pain            | 10017638 | hepatobiliary disorders                         | C0151824 | 200  | 149  | 47   | 3.17   |
| gastroenteritis viral       | 10017918 | gastrointestinal disorders                      | C0318712 | 1562 | 1059 | 440  | 2.41   |
| genital herpes              | 10018150 | infections and infestations                     | C0019342 | 211  | 158  | 40   | 3.95   |
| gingival disorder           | 10018280 | gastrointestinal disorders                      | C0017563 | 865  | 622  | 209  | 2.98   |
| gingival recession          | 10018290 | gastrointestinal disorders                      | C0017572 | 383  | 254  | 116  | 2.19   |
| glossitis                   | 10018386 | gastrointestinal disorders                      | C0017675 | 1622 | 1051 | 492  | 2.14   |
| glossodynia                 | 10018388 | gastrointestinal disorders                      | C0017672 | 3239 | 2291 | 816  | 2.81   |
| goitre                      | 10018498 | metabolism and nutrition disorders              | C0018021 | 1082 | 820  | 233  | 3.52   |
| gun shot wound              | 10018794 | injury, poisoning and procedural complications  | C0043252 | 1232 | 233  | 986  | 0.24   |
| haemangioma of liver        | 10018821 | hepatobiliary disorders                         | C0238246 | 411  | 302  | 104  | 2.90   |
| hair disorder               | 10019037 | skin and subcutaneous tissue disorders          | C0018500 | 315  | 232  | 63   | 3.68   |
| hand fracture               | 10019114 | musculoskeletal and connective tissue disorders | C0435632 | 712  | 468  | 229  | 2.04   |
| heart valve incompetence    | 10067660 | cardiac disorders                               | C0264879 | 327  | 220  | 92   | 2.39   |
| helly syndrome              | 10049058 | hepatobiliary disorders                         | C0162739 | 134  | 123  | 6    | 20.50  |
| hepatic adenoma             | 10019629 | hepatobiliary disorders                         | C0541760 | 138  | 114  | 18   | 6.33   |

|                                      |          |                                                            |          |       |       |      |      |
|--------------------------------------|----------|------------------------------------------------------------|----------|-------|-------|------|------|
| herpes simplex                       | 10019948 | infections and infestations                                | C0019348 | 3656  | 2487  | 1035 | 2.40 |
| hip fracture                         | 10020100 | musculoskeletal and<br>connective tissue disorders         | C0019557 | 4516  | 3436  | 993  | 3.46 |
| hirsutism                            | 10020112 | endocrine disorders                                        | C0019572 | 865   | 755   | 87   | 8.68 |
| hiv infection                        | 10020161 | infections and infestations                                | C0019693 | 1111  | 142   | 724  | 0.20 |
| hiv test positive                    | 10020188 | investigations                                             | C0019699 | 865   | 76    | 640  | 0.12 |
| humerus<br>fracture                  | 10020462 | musculoskeletal and<br>connective tissue disorders         | C0020162 | 852   | 628   | 203  | 3.09 |
| hydrocele                            | 10020488 | congenital, familial and<br>genetic disorders              | C1720771 | 292   | 13    | 251  | 0.05 |
| hyperacusis                          | 10020559 | nervous system disorders                                   | C0034880 | 935   | 646   | 271  | 2.38 |
| hyperprolactinaemia                  | 10020737 | endocrine disorders                                        | C0020514 | 732   | 578   | 122  | 4.74 |
| hypersensitivity                     | 10020751 | immune system disorders                                    | C0020517 | 21620 | 13640 | 6387 | 2.14 |
| hypersexuality                       | 10066364 | psychiatric disorders                                      | C0312420 | 291   | 59    | 216  | 0.27 |
| hypertonic<br>bladder                | 10020853 | renal and urinary disorders                                | C0878773 | 393   | 264   | 118  | 2.24 |
| hypertrichosis                       | 10020864 | skin and subcutaneous<br>tissue disorders                  | C0020555 | 312   | 218   | 78   | 2.79 |
| hypoesthesia<br>oral                 | 10057371 | gastrointestinal disorders                                 | C0521592 | 2735  | 1886  | 701  | 2.69 |
| hypothyroidism                       | 10021114 | metabolism and nutrition<br>disorders                      | C0020676 | 5221  | 3519  | 1463 | 2.41 |
| hypotrichosis                        | 10021126 | skin and subcutaneous<br>tissue disorders                  | C0020678 | 512   | 409   | 95   | 4.31 |
| immune<br>reconstitution<br>syndrome | 10054014 | immune system disorders                                    | C1096197 | 1185  | 338   | 766  | 0.44 |
| influenza                            | 10022000 | infections and infestations                                | C0021400 | 7666  | 4999  | 2287 | 2.19 |
| influenza like<br>illness            | 10022004 | general disorders and<br>administration site<br>conditions | C0521839 | 17730 | 12010 | 5214 | 2.30 |
| inguinal hernia                      | 10022016 | gastrointestinal disorders                                 | C0019294 | 675   | 145   | 490  | 0.30 |
| injection site<br>atrophy            | 10022048 | general disorders and<br>administration site<br>conditions | C0151512 | 322   | 260   | 45   | 5.78 |
| injection site<br>extravasation      | 10022062 | general disorders and<br>administration site<br>conditions | C0521500 | 2188  | 1448  | 590  | 2.45 |
| injection site<br>haemorrhage        | 10022067 | vascular disorders                                         | C0151698 | 11200 | 8676  | 1939 | 4.47 |

|                                      |          |                                                      |          |       |       |      |      |
|--------------------------------------|----------|------------------------------------------------------|----------|-------|-------|------|------|
| injection site hypersensitivity      | 10022071 | general disorders and administration site conditions | C0151726 | 183   | 133   | 36   | 3.69 |
| injection site induration            | 10022075 | general disorders and administration site conditions | C0521509 | 2099  | 1149  | 464  | 2.48 |
| injection site inflammation          | 10022078 | general disorders and administration site conditions | C0151734 | 1272  | 825   | 305  | 2.70 |
| injection site irritation            | 10022079 | general disorders and administration site conditions | C0521498 | 6423  | 5010  | 1214 | 4.13 |
| injection site mass                  | 10022081 | general disorders and administration site conditions | C0151775 | 1412  | 1005  | 289  | 3.48 |
| injection site oedema                | 10022085 | general disorders and administration site conditions | C0151605 | 1015  | 636   | 308  | 2.06 |
| injection site pain                  | 10022086 | general disorders and administration site conditions | C0151828 | 28020 | 18240 | 5163 | 3.53 |
| injection site rash                  | 10022094 | general disorders and administration site conditions | C0521505 | 2992  | 2113  | 411  | 5.14 |
| injection site reaction              | 10022095 | general disorders and administration site conditions | C0151735 | 8180  | 5489  | 1429 | 3.84 |
| injection site scar                  | 10059009 | general disorders and administration site conditions | C1142162 | 193   | 135   | 42   | 3.21 |
| injection site swelling              | 10053425 | general disorders and administration site conditions | C0151605 | 7774  | 4633  | 1082 | 4.28 |
| injection site urticaria             | 10022107 | general disorders and administration site conditions | C0392196 | 2336  | 1694  | 297  | 5.70 |
| intracranial aneurysm                | 10022758 | nervous system disorders                             | C0007766 | 792   | 570   | 198  | 2.88 |
| intracranial venous sinus thrombosis | 10061251 | vascular disorders                                   | C0338573 | 354   | 254   | 92   | 2.76 |
| iris disorder                        | 10061254 | eye disorders                                        | C0022078 | 315   | 59    | 240  | 0.25 |
| iron deficiency anaemia              | 10022972 | blood and lymphatic system disorders                 | C0162316 | 1972  | 1297  | 627  | 2.07 |
| irritable bowel syndrome             | 10023003 | gastrointestinal disorders                           | C0022104 | 2446  | 1814  | 576  | 3.15 |
| jaw disorder                         | 10061257 | musculoskeletal and connective tissue disorders      | C0022362 | 1861  | 1327  | 467  | 2.84 |
| joint dislocation                    | 10023204 | musculoskeletal and connective tissue disorders      | C0012691 | 1390  | 931   | 411  | 2.27 |



|                                |          |                                                                           |          |      |      |      |      |
|--------------------------------|----------|---------------------------------------------------------------------------|----------|------|------|------|------|
| joint sprain                   | 10023229 | musculoskeletal and<br>connective tissue disorders                        | C0434437 | 1354 | 966  | 360  | 2.68 |
| kaposi's<br>sarcoma            | 10023284 | neoplasms benign,<br>malignant and unspecified<br>(incl cysts and polyps) | C0036220 | 446  | 80   | 322  | 0.25 |
| keratoconjunctivi<br>tis sicca | 10023350 | eye disorders                                                             | C0022575 | 518  | 378  | 125  | 3.02 |
| kidney infection               | 10023424 | renal and urinary disorders                                               | C0021313 | 1806 | 1416 | 321  | 4.41 |
| labyrinthitis                  | 10023567 | infections and infestations                                               | C0022893 | 494  | 332  | 140  | 2.37 |
| laryngitis                     | 10023874 | respiratory, thoracic and<br>mediastinal disorders                        | C0023067 | 1121 | 833  | 221  | 3.77 |
| latex allergy                  | 10056435 | immune system disorders                                                   | C0577628 | 179  | 132  | 25   | 5.28 |
| leiomyoma                      | 10024184 | musculoskeletal and<br>connective tissue disorders                        | C0023267 | 124  | 105  | 15   | 7.00 |
| ligament rupture               | 10065433 | injury, poisoning and<br>procedural complications                         | C0262538 | 447  | 285  | 131  | 2.18 |
| lip pain                       | 10024561 | gastrointestinal disorders                                                | C0267028 | 469  | 332  | 120  | 2.77 |
| lower limb<br>fracture         | 10061599 | musculoskeletal and<br>connective tissue disorders                        | C0178317 | 1771 | 1296 | 443  | 2.93 |
| lumbar vertebral<br>fracture   | 10049947 | musculoskeletal and<br>connective tissue disorders                        | C0262544 | 552  | 383  | 154  | 2.49 |
| lymphoedema                    | 10025282 | blood and lymphatic<br>system disorders                                   | C0024236 | 920  | 653  | 227  | 2.88 |
| madarosis                      | 10051235 | skin and subcutaneous<br>tissue disorders                                 | C0271321 | 556  | 483  | 58   | 8.33 |
| mastitis                       | 10026883 | infections and infestations                                               | C0024894 | 319  | 276  | 34   | 8.12 |
| meningioma                     | 10027191 | neoplasms benign,<br>malignant and unspecified<br>(incl cysts and polyps) | C0025286 | 696  | 519  | 150  | 3.46 |
| mesothelioma                   | 10027406 | neoplasms benign,<br>malignant and unspecified<br>(incl cysts and polyps) | C0025500 | 112  | 18   | 90   | 0.20 |
| middle ear<br>effusion         | 10062545 | ear and labyrinth disorders                                               | C0029883 | 230  | 163  | 55   | 2.96 |
| migraine                       | 10027599 | vascular disorders                                                        | C0149931 | 9126 | 7246 | 1535 | 4.72 |
| migraine with<br>aura          | 10027607 | vascular disorders                                                        | C0154723 | 372  | 259  | 102  | 2.54 |

|                                 |          |                                                 |          |       |      |      |      |
|---------------------------------|----------|-------------------------------------------------|----------|-------|------|------|------|
| mitral valve prolapse           | 10027730 | cardiac disorders                               | C0026267 | 1179  | 912  | 249  | 3.66 |
| mitral valve stenosis           | 10027733 | cardiac disorders                               | C0026269 | 362   | 271  | 84   | 3.23 |
| mood swings                     | 10027951 | psychiatric disorders                           | C0085633 | 7749  | 5101 | 2423 | 2.11 |
| motion sickness                 | 10027990 | ear and labyrinth disorders                     | C0026603 | 398   | 270  | 116  | 2.33 |
| mouth ulceration                | 10028034 | gastrointestinal disorders                      | C0149745 | 5534  | 3487 | 1741 | 2.00 |
| multiple fractures              | 10028200 | musculoskeletal and connective tissue disorders | C0016655 | 586   | 384  | 189  | 2.03 |
| multiple sclerosis              | 10028245 | nervous system disorders                        | C0026769 | 7997  | 6038 | 1849 | 3.27 |
| nail disorder                   | 10028694 | skin and subcutaneous tissue disorders          | C0027339 | 923   | 654  | 207  | 3.16 |
| nasal ulcer                     | 10028780 | respiratory, thoracic and mediastinal disorders | C0264267 | 260   | 197  | 49   | 4.02 |
| nasopharyngitis                 | 10028810 | respiratory, thoracic and mediastinal disorders | C0027441 | 12510 | 7955 | 3759 | 2.12 |
| neuralgia                       | 10029223 | nervous system disorders                        | C0027796 | 2149  | 1420 | 664  | 2.14 |
| neuromyelitis optica            | 10029322 | nervous system disorders                        | C0027873 | 127   | 104  | 20   | 5.20 |
| nicotine dependence             | 10057852 | psychiatric disorders                           | C0028043 | 2070  | 1307 | 635  | 2.06 |
| oedema mouth                    | 10030110 | immune system disorders                         | C0236065 | 2098  | 1443 | 554  | 2.60 |
| oesophageal carcinoma           | 10030155 | gastrointestinal disorders                      | C0152018 | 540   | 158  | 348  | 0.45 |
| oesophageal spasm               | 10030184 | gastrointestinal disorders                      | C0014863 | 549   | 384  | 148  | 2.59 |
| oesophageal varices haemorrhage | 10030210 | gastrointestinal disorders                      | C0155789 | 537   | 158  | 321  | 0.49 |
| onychoclasia                    | 10048886 | skin and subcutaneous tissue disorders          | C0546956 | 389   | 311  | 47   | 6.62 |
| onychomadesis                   | 10049274 | skin and subcutaneous tissue disorders          | C0263540 | 389   | 251  | 119  | 2.11 |
| optic ischaemic neuropathy      | 10030924 | eye disorders                                   | C0155305 | 1111  | 251  | 808  | 0.31 |
| optic neuritis                  | 10030942 | nervous system disorders                        | C0029134 | 1694  | 1172 | 447  | 2.62 |
| oral disorder                   | 10067621 | gastrointestinal disorders                      | C0026636 | 961   | 652  | 275  | 2.37 |

|                              |          |                                                                           |          |      |      |      |      |
|------------------------------|----------|---------------------------------------------------------------------------|----------|------|------|------|------|
| oral herpes                  | 10067152 | infections and infestations                                               | C0341012 | 1425 | 1034 | 318  | 3.25 |
| oral infection               | 10048685 | infections and infestations                                               | C0555971 | 820  | 655  | 146  | 4.49 |
| osteoarthritis               | 10031161 | musculoskeletal and<br>connective tissue disorders                        | C0029408 | 4947 | 3410 | 1416 | 2.41 |
| osteoporotic<br>fracture     | 10031290 | injury, poisoning and<br>procedural complications                         | C0521170 | 256  | 185  | 65   | 2.85 |
| palmar<br>erythema           | 10033551 | skin and subcutaneous<br>tissue disorders                                 | C0014745 | 264  | 189  | 64   | 2.95 |
| panic attack                 | 10033664 | psychiatric disorders                                                     | C0086769 | 7792 | 5274 | 2312 | 2.28 |
| panniculitis                 | 10033675 | immune system disorders                                                   | C0030326 | 342  | 236  | 90   | 2.62 |
| papilloma viral<br>infection | 10061331 | infections and infestations                                               | C0950124 | 182  | 154  | 19   | 8.11 |
| paraesthesia<br>oral         | 10057372 | gastrointestinal disorders                                                | C0521591 | 2121 | 1526 | 501  | 3.05 |
| parathyroid<br>tumour benign | 10033964 | neoplasms benign,<br>malignant and unspecified<br>(incl cysts and polyps) | C0154041 | 201  | 151  | 47   | 3.21 |
| patella fracture             | 10034122 | musculoskeletal and<br>connective tissue disorders                        | C0159849 | 312  | 248  | 57   | 4.35 |
| pathological<br>fracture     | 10034156 | injury, poisoning and<br>procedural complications                         | C0016663 | 1129 | 765  | 338  | 2.26 |
| periarthritis                | 10034464 | musculoskeletal and<br>connective tissue disorders                        | C0031037 | 383  | 269  | 108  | 2.49 |
| periodontal<br>disease       | 10034536 | gastrointestinal disorders                                                | C0031090 | 475  | 346  | 121  | 2.86 |
| periodontitis                | 10034539 | gastrointestinal disorders                                                | C0031099 | 593  | 401  | 170  | 2.36 |
| periorbital<br>haematoma     | 10034544 | injury, poisoning and<br>procedural complications                         | C0520723 | 445  | 312  | 126  | 2.48 |
| pharyngeal<br>oedema         | 10034829 | respiratory, thoracic and<br>mediastinal disorders                        | C0236024 | 4335 | 2881 | 1248 | 2.31 |
| pharyngitis<br>streptococcal | 10034839 | respiratory, thoracic and<br>mediastinal disorders                        | C0036689 | 968  | 650  | 257  | 2.53 |
| plantar fasciitis            | 10035155 | musculoskeletal and<br>connective tissue disorders                        | C0149756 | 452  | 297  | 142  | 2.09 |

|                                          |          |                                                 |          |       |      |      |        |
|------------------------------------------|----------|-------------------------------------------------|----------|-------|------|------|--------|
| pulmonary arterial hypertension          | 10064911 | respiratory, thoracic and mediastinal disorders | C0152171 | 488   | 301  | 137  | 2.20   |
| pulmonary thrombosis                     | 10037437 | vascular disorders                              | C0151946 | 1159  | 771  | 362  | 2.13   |
| pustular psoriasis                       | 10037575 | skin and subcutaneous tissue disorders          | C0152081 | 534   | 332  | 155  | 2.14   |
| pyelonephritis                           | 10037596 | renal and urinary disorders                     | C0034186 | 1307  | 922  | 338  | 2.73   |
| pyelonephritis acute                     | 10037597 | renal and urinary disorders                     | C0520575 | 303   | 212  | 77   | 2.75   |
| radius fracture                          | 10037802 | musculoskeletal and connective tissue disorders | C0034628 | 411   | 309  | 97   | 3.19   |
| raynaud's phenomenon                     | 10037912 | vascular disorders                              | C0034735 | 1133  | 784  | 298  | 2.63   |
| rectal prolapse                          | 10038077 | gastrointestinal disorders                      | C0034888 | 220   | 180  | 35   | 5.14   |
| rectocele                                | 10038084 | gastrointestinal disorders                      | C0149771 | 212   | 207  | 1    | 207.00 |
| restless legs syndrome                   | 10058920 | musculoskeletal and connective tissue disorders | C0035258 | 2467  | 1654 | 669  | 2.47   |
| rheumatoid arthritis                     | 10039073 | immune system disorders                         | C0003873 | 10020 | 6828 | 1623 | 4.21   |
| rheumatoid nodule                        | 10048694 | immune system disorders                         | C0035450 | 290   | 205  | 61   | 3.36   |
| rosacea                                  | 10039218 | skin and subcutaneous tissue disorders          | C0035854 | 579   | 378  | 178  | 2.12   |
| ruptured cerebral aneurysm               | 10039330 | nervous system disorders                        | C0242084 | 298   | 206  | 87   | 2.37   |
| sarcoidosis                              | 10039486 | immune system disorders                         | C0036202 | 802   | 503  | 244  | 2.06   |
| scleroderma                              | 10039710 | skin and subcutaneous tissue disorders          | C0011644 | 768   | 567  | 160  | 3.54   |
| scoliosis                                | 10039722 | musculoskeletal and connective tissue disorders | C0036439 | 886   | 600  | 244  | 2.46   |
| seasonal allergy                         | 10048908 | immune system disorders                         | C0018621 | 481   | 328  | 132  | 2.48   |
| secondary progressive multiple sclerosis | 10063400 | nervous system disorders                        | C0751965 | 172   | 134  | 36   | 3.72   |
| sensitivity of teeth                     | 10040012 | gastrointestinal disorders                      | C0011432 | 460   | 341  | 99   | 3.44   |
| sexual abuse                             | 10040461 | social circumstances                            | C0282350 | 102   | 16   | 84   | 0.19   |

|                                    |          |                                                 |          |      |      |      |       |
|------------------------------------|----------|-------------------------------------------------|----------|------|------|------|-------|
| sickle cell anaemia with crisis    | 10040642 | congenital, familial and genetic disorders      | C0238425 | 336  | 222  | 102  | 2.18  |
| sinus congestion                   | 10040742 | respiratory, thoracic and mediastinal disorders | C0152029 | 1916 | 1207 | 597  | 2.02  |
| sinus disorder                     | 10062244 | respiratory, thoracic and mediastinal disorders | C0030469 | 1876 | 1237 | 579  | 2.14  |
| sinusitis                          | 10040753 | respiratory, thoracic and mediastinal disorders | C0037199 | 9404 | 6371 | 2296 | 2.77  |
| sjogren's syndrome                 | 10040767 | musculoskeletal and connective tissue disorders | C1527336 | 613  | 492  | 97   | 5.07  |
| skin atrophy                       | 10040799 | skin and subcutaneous tissue disorders          | C0151514 | 757  | 485  | 221  | 2.19  |
| skin hyperpigmentation             | 10040865 | skin and subcutaneous tissue disorders          | C0162834 | 1306 | 936  | 312  | 3.00  |
| skin irritation                    | 10040880 | skin and subcutaneous tissue disorders          | C0152030 | 1682 | 1039 | 510  | 2.04  |
| spinal compression fracture        | 10041541 | metabolism and nutrition disorders              | C0262431 | 1454 | 981  | 453  | 2.17  |
| spinal disorder                    | 10061368 | musculoskeletal and connective tissue disorders | C0037933 | 1344 | 880  | 428  | 2.06  |
| spinal fracture                    | 10041569 | musculoskeletal and connective tissue disorders | C0080179 | 1989 | 1528 | 420  | 3.64  |
| spondylolistheses                  | 10063550 | musculoskeletal and connective tissue disorders | C0038016 | 303  | 237  | 64   | 3.70  |
| steatorrhoea                       | 10041969 | gastrointestinal disorders                      | C0038238 | 2064 | 1588 | 286  | 5.55  |
| stress cardiomyopathy              | 10066286 | cardiac disorders                               | C1739395 | 305  | 265  | 34   | 7.79  |
| stress fracture                    | 10042212 | musculoskeletal and connective tissue disorders | C0016664 | 762  | 650  | 93   | 6.99  |
| stress urinary incontinence        | 10066218 | renal and urinary disorders                     | C0042025 | 174  | 163  | 8    | 20.38 |
| superior sagittal sinus thrombosis | 10042567 | vascular disorders                              | C0338575 | 270  | 185  | 73   | 2.53  |

|                                   |          |                                                                     |          |      |      |     |      |
|-----------------------------------|----------|---------------------------------------------------------------------|----------|------|------|-----|------|
| systemic lupus erythematosus      | 10042945 | skin and subcutaneous tissue disorders                              | C0024141 | 4127 | 3147 | 690 | 4.56 |
| systemic lupus erythematosus rash | 10042946 | musculoskeletal and connective tissue disorders                     | C0521471 | 322  | 237  | 67  | 3.54 |
| temporal arteritis                | 10043207 | vascular disorders                                                  | C1956391 | 312  | 208  | 89  | 2.34 |
| temporomandibular joint syndrome  | 10043220 | nervous system disorders                                            | C0039496 | 583  | 489  | 74  | 6.61 |
| tension headache                  | 10043269 | nervous system disorders                                            | C0033893 | 446  | 302  | 138 | 2.19 |
| thrombophlebitis superficial      | 10043595 | vascular disorders                                                  | C1510431 | 637  | 440  | 178 | 2.47 |
| thyroid cancer                    | 10066474 | endocrine disorders                                                 | C0007115 | 676  | 488  | 152 | 3.21 |
| thyroid cyst                      | 10043706 | endocrine disorders                                                 | C0162299 | 146  | 122  | 22  | 5.55 |
| thyroid disorder                  | 10043709 | endocrine disorders                                                 | C0040128 | 1851 | 1381 | 398 | 3.47 |
| thyroid mass                      | 10058900 | endocrine disorders                                                 | C0349453 | 130  | 109  | 19  | 5.74 |
| thyroid neoplasm                  | 10043744 | neoplasms benign, malignant and unspecified (incl cysts and polyps) | C0040136 | 769  | 627  | 128 | 4.90 |
| thyroiditis                       | 10043778 | endocrine disorders                                                 | C0040147 | 282  | 188  | 75  | 2.51 |
| tibia fracture                    | 10043827 | musculoskeletal and connective tissue disorders                     | C0040185 | 676  | 487  | 173 | 2.82 |
| tongue coated                     | 10043945 | gastrointestinal disorders                                          | C0009144 | 422  | 281  | 134 | 2.10 |
| tongue disorder                   | 10043951 | gastrointestinal disorders                                          | C0040409 | 1906 | 1274 | 554 | 2.30 |
| tooth abscess                     | 10044016 | gastrointestinal disorders                                          | C0518988 | 1923 | 1290 | 555 | 2.32 |
| tooth disorder                    | 10044034 | gastrointestinal disorders                                          | C0040435 | 2571 | 1796 | 669 | 2.68 |
| tooth fracture                    | 10062544 | injury, poisoning and procedural complications                      | C0040441 | 1196 | 864  | 277 | 3.12 |
| tooth infection                   | 10048762 | gastrointestinal disorders                                          | C0877046 | 1213 | 812  | 326 | 2.49 |
| tooth injury                      | 10044043 | injury, poisoning and procedural complications                      | C0242891 | 390  | 272  | 111 | 2.45 |
| tooth loss                        | 10044044 | gastrointestinal disorders                                          | C0080233 | 1651 | 1089 | 503 | 2.17 |
| tourette's disorder               | 10044126 | nervous system disorders                                            | C0040517 | 239  | 58   | 165 | 0.35 |

|                                   |          |                                                 |          |       |       |      |       |
|-----------------------------------|----------|-------------------------------------------------|----------|-------|-------|------|-------|
| transverse sinus thrombosis       | 10044457 | vascular disorders                              | C0270639 | 147   | 115   | 29   | 3.97  |
| trichorrhexis                     | 10044625 | skin and subcutaneous tissue disorders          | C0702163 | 251   | 228   | 10   | 22.80 |
| trigeminal neuralgia              | 10044652 | nervous system disorders                        | C0040997 | 691   | 534   | 141  | 3.79  |
| ulna fracture                     | 10045375 | musculoskeletal and connective tissue disorders | C0041601 | 169   | 128   | 40   | 3.20  |
| upper limb fracture               | 10061394 | musculoskeletal and connective tissue disorders | C0178316 | 2143  | 1662  | 435  | 3.82  |
| upper respiratory tract infection | 10046306 | respiratory, thoracic and mediastinal disorders | C0041912 | 4834  | 3045  | 1511 | 2.02  |
| urinary tract infection           | 10046571 | renal and urinary disorders                     | C0042029 | 16870 | 12340 | 4034 | 3.06  |
| urticaria                         | 10046735 | immune system disorders                         | C0042109 | 22160 | 14060 | 6838 | 2.06  |
| varicose vein                     | 10046996 | vascular disorders                              | C0042345 | 637   | 472   | 150  | 3.15  |
| vein disorder                     | 10047184 | vascular disorders                              | C0235522 | 739   | 520   | 200  | 2.60  |
| visual impairment                 | 10047571 | eye disorders                                   | C0042798 | 6183  | 3918  | 1947 | 2.01  |
| vitamin d deficiency              | 10047626 | metabolism and nutrition disorders              | C0042870 | 577   | 423   | 126  | 3.36  |
| vomiting                          | 10047708 | gastrointestinal disorders                      | C0221151 | 507   | 335   | 152  | 2.20  |
| projectile wrist fracture         | 10048049 | musculoskeletal and connective tissue disorders | C0435630 | 1503  | 1238  | 233  | 5.31  |
