# Supplementary material
Source: PubMed Central journal article supplement (PMC4194268)
Supplement: NIHMS619284-supplement-S2.pdf [file NIHMS619284-supplement-S2.pdf]

| AEs                           | Term information |                                                 | ICD9 code | FAERS Results |       |        |       |
|-------------------------------|------------------|-------------------------------------------------|-----------|---------------|-------|--------|-------|
|                               | PT code          | SOC                                             |           | emale         | F/M   | logF/M |       |
| systemic lupus erythematosus  | 10042945         | skin and subcutaneous tissue disorders          | 710.0     | 3147          | 690   | 4.56   | 2.19  |
| cholecystitis chronic         | 10008617         | hepatobiliary disorders                         | 575.11    | 483           | 100   | 4.83   | 2.27  |
| colitis ischaemic             | 10009895         | gastrointestinal disorders                      | 557.9     | 1489          | 575   | 2.59   | 1.37  |
| herpes simplex                | 10019948         | infections and infestations                     | 054       | 2487          | 1035  | 2.4    | 1.26  |
| hiv infection                 | 10020161         | infections and infestations                     | 042       | 142           | 724   | 0.2    | -2.35 |
| food allergy                  | 10016946         | immune system disorders                         | 995.3     | 435           | 207   | 2.1    | 1.07  |
| ankle fracture                | 10002544         | musculoskeletal and connective tissue disorders | 824       | 1696          | 445   | 3.81   | 1.93  |
| dysphonia                     | 10013952         | nervous system disorders                        | 784.42    | 4706          | 2302  | 2.04   | 1.03  |
| osteoarthritis                | 10031161         | tissue disorders                                | 715.9     | 3410          | 1416  | 2.41   | 1.27  |
| rheumatoid arthritis          | 10039073         | immune system disorders                         | 714       | 6828          | 1623  | 4.21   | 2.07  |
| scleroderma                   | 10039710         | skin and subcutaneous tissue disorders          | 710.1     | 567           | 160   | 3.54   | 1.83  |
| urticaria                     | 10046735         | immune system disorders                         | 708.9     | 14060         | 6838  | 2.06   | 1.04  |
| acne                          | 10000496         | skin and subcutaneous tissue disorders          | 706.1     | 2282          | 812   | 2.81   | 1.49  |
| alopecia                      | 10001760         | skin and subcutaneous tissue disorders          | 704       | 18980         | 3465  | 5.48   | 2.45  |
| cutaneous lupus erythematosus | 10056509         | skin and subcutaneous tissue disorders          | 695.4     | 399           | 109   | 3.66   | 1.87  |
| urinary tract infection       | 10046571         | renal and urinary disorders                     | 599       | 12340         | 4034  | 3.06   | 1.61  |
| pyelonephritis                | 10037596         | renal and urinary disorders                     | 590.8     | 922           | 338   | 2.73   | 1.45  |
| coeliac disease               | 10009839         | immune system disorders                         | 579       | 782           | 254   | 3.08   | 1.62  |
| autoimmune hepatitis          | 10003827         | immune system disorders                         | 571.42    | 997           | 322   | 3.1    | 1.63  |
| irritable bowel syndrome      | 10023003         | gastrointestinal disorders                      | 564.1     | 1814          | 576   | 3.15   | 1.66  |
| constipation                  | 10010774         | gastrointestinal disorders                      | 564       | 22880         | 11220 | 2.04   | 1.03  |
| dyspepsia                     | 10013946         | gastrointestinal disorders                      | 536.8     | 13330         | 6607  | 2.02   | 1.01  |
| glossodynia                   | 10018388         | gastrointestinal disorders                      | 529.6     | 2291          | 816   | 2.81   | 1.49  |
| dry mouth                     | 10013781         | gastrointestinal disorders                      | 527.7     | 12700         | 5570  | 2.28   | 1.19  |

|                                   |                                                      |          |       |        |      |      |       |
|-----------------------------------|------------------------------------------------------|----------|-------|--------|------|------|-------|
| asthma                            | respiratory, thoracic and mediastinal disorders      | 10003553 | 7131  | 493.9  | 3133 | 2.28 | 1.19  |
| bronchitis                        | respiratory, thoracic and mediastinal disorders      | 10006451 | 5509  | 490    | 2317 | 2.38 | 1.25  |
| influenza like illness            | general disorders and administration site conditions | 10022004 | 12010 | 487.1  | 5214 | 2.3  | 1.2   |
| influenza                         | infections and infestations                          | 10022000 | 4999  | 487.1  | 2287 | 2.19 | 1.13  |
| sinusitis                         | respiratory, thoracic and mediastinal disorders      | 10040753 | 6371  | 473.9  | 2296 | 2.77 | 1.47  |
| upper respiratory tract infection | respiratory, thoracic and mediastinal disorders      | 10046306 | 3045  | 465.9  | 1511 | 2.02 | 1.01  |
| lymphoedema                       | blood and lymphatic system disorders                 | 10025282 | 653   | 457.1  | 227  | 2.88 | 1.52  |
| raynaud's phenomenon              | vascular disorders                                   | 10037912 | 784   | 443    | 298  | 2.63 | 1.4   |
| intracranial aneurysm             | nervous system disorders                             | 10022758 | 570   | 442.9  | 198  | 2.88 | 1.53  |
| pulmonary thrombosis              | vascular disorders                                   | 10037437 | 771   | 415.1  | 362  | 2.13 | 1.09  |
| hyperacusis                       | nervous system disorders                             | 10020559 | 646   | 388.42 | 271  | 2.38 | 1.25  |
| optic ischaemic neuropathy        | eye disorders                                        | 10030924 | 251   | 377.41 | 808  | 0.31 | -1.69 |
| optic neuritis                    | nervous system disorders                             | 10030942 | 1172  | 377.3  | 447  | 2.62 | 1.39  |
| blepharitis                       | skin and subcutaneous tissue disorders               | 10005148 | 342   | 373    | 151  | 2.26 | 1.18  |
| cataract                          | eye disorders                                        | 10007739 | 3857  | 366    | 1839 | 2.1  | 1.07  |
| carpal tunnel syndrome            | nervous system disorders                             | 10007697 | 1614  | 354    | 628  | 2.57 | 1.36  |
| trigeminal neuralgia              | nervous system disorders                             | 10044652 | 534   | 350.1  | 141  | 3.79 | 1.92  |
| benign intracranial hypertension  | nervous system disorders                             | 10004277 | 630   | 348.2  | 244  | 2.58 | 1.37  |
| migraine                          | vascular disorders                                   | 10027599 | 7246  | 346    | 1535 | 4.72 | 2.24  |
| multiple sclerosis                | nervous system disorders                             | 10028245 | 6038  | 340    | 1849 | 3.27 | 1.71  |
| restless legs syndrome            | musculoskeletal and connective tissue disorders      | 10058920 | 1654  | 333.94 | 669  | 2.47 | 1.31  |
| bruxism                           | gastrointestinal disorders                           | 10006514 | 710   | 306.8  | 305  | 2.33 | 1.22  |
| conversion disorder               | psychiatric disorders                                | 10010893 | 742   | 300.11 | 235  | 3.16 | 1.66  |

|                         |          |                                                                     |        |       |      |      |       |
|-------------------------|----------|---------------------------------------------------------------------|--------|-------|------|------|-------|
| iron deficiency anaemia | 10022972 | blood and lymphatic system disorders                                | 280.9  | 1297  | 627  | 2.07 | 1.05  |
| goitre                  | 10018498 | metabolism and nutrition disorders                                  | 240.9  | 820   | 233  | 3.52 | 1.82  |
| meningioma              | 10027191 | neoplasms benign, malignant and unspecified (incl cysts and polyps) | 225.2  | 519   | 150  | 3.46 | 1.79  |
| thyroid cancer          | 10066474 | endocrine disorders                                                 | 193    | 488   | 152  | 3.21 | 1.68  |
| bladder cancer          | 10005003 | neoplasms benign, malignant and unspecified (incl cysts and polyps) | 188.9  | 306   | 652  | 0.47 | -1.09 |
| sarcoidosis             | 10039486 | immune system disorders                                             | 135    | 503   | 244  | 2.06 | 1.04  |
| steatorrhea             | 10041969 | gastrointestinal disorders                                          | 579.8  | 1588  | 286  | 5.55 | 2.47  |
| oedema mouth            | 10030110 | immune system disorders general disorders and                       | 784.2  | 1443  | 554  | 2.6  | 1.38  |
| injection site swelling | 10053425 | administration site conditions                                      | 782.2  | 4633  | 1082 | 4.28 | 2.1   |
| gastroenteritis viral   | 10017918 | gastrointestinal disorders respiratory, thoracic and                | 558.9  | 1059  | 440  | 2.41 | 1.27  |
| pharyngeal oedema       | 10034829 | mediastinal disorders                                               | 478.25 | 2881  | 1248 | 2.31 | 1.21  |
| angle closure glaucoma  | 10002500 | eye disorders                                                       | 996.7  | 542   | 168  | 3.23 | 1.69  |
| hypersensitivity        | 10020751 | immune system disorders                                             | 995.3  | 13640 | 6387 | 2.14 | 1.09  |
| contusion               | 10050584 | vascular disorders                                                  | 924.9  | 7906  | 2991 | 2.64 | 1.4   |
| concussion              | 10010254 | nervous system disorders musculoskeletal and connective             | 850    | 584   | 282  | 2.07 | 1.05  |
| femoral neck fracture   | 10016450 | tissue disorders                                                    | 820    | 635   | 244  | 2.6  | 1.38  |
| wrist fracture          | 10048049 | musculoskeletal and connective tissue disorders                     | 814    | 1238  | 233  | 5.31 | 2.41  |
| humerus fracture        | 10020462 | musculoskeletal and connective tissue disorders                     | 812    | 628   | 203  | 3.09 | 1.63  |
| vomiting projectile     | 10047708 | gastrointestinal disorders                                          | 787    | 335   | 152  | 2.2  | 1.14  |
| aphonia                 | 10002953 | psychiatric disorders general disorders and                         | 784.41 | 1126  | 430  | 2.62 | 1.39  |
| injection site oedema   | 10022085 | administration site conditions                                      | 782.3  | 636   | 308  | 2.06 | 1.05  |

|                             |          |                                                      |        |       |      |      |       |
|-----------------------------|----------|------------------------------------------------------|--------|-------|------|------|-------|
| injection site rash         | 10022094 | general disorders and administration site conditions | 782.1  | 2113  | 411  | 5.14 | 2.36  |
| application site rash       | 10003054 | general disorders and administration site conditions | 782.1  | 1040  | 391  | 2.66 | 1.41  |
| paraesthesia oral           | 10057372 | gastrointestinal disorders                           | 782    | 1526  | 501  | 3.05 | 1.61  |
| hypoaesthesia oral          | 10057371 | gastrointestinal disorders                           | 782    | 1886  | 701  | 2.69 | 1.43  |
| injection site pain         | 10022086 | general disorders and administration site conditions | 780.96 | 18240 | 5163 | 3.53 | 1.82  |
| pathological fracture       | 10034156 | injury, poisoning and procedural complications       | 733.1  | 765   | 338  | 2.26 | 1.18  |
| exostosis                   | 10015688 | musculoskeletal and connective tissue disorders      | 726.91 | 1014  | 399  | 2.54 | 1.35  |
| spinal disorder             | 10061368 | musculoskeletal and connective tissue disorders      | 724.9  | 880   | 428  | 2.06 | 1.04  |
| arthropathy                 | 10003285 | musculoskeletal and connective tissue disorders      | 716.9  | 3285  | 1609 | 2.04 | 1.03  |
| keratoconjunctivitis sicca  | 10023350 | eye disorders                                        | 710.2  | 378   | 125  | 3.02 | 1.6   |
| injection site urticaria    | 10022107 | general disorders and administration site conditions | 708.9  | 1694  | 297  | 5.7  | 2.51  |
| nail disorder               | 10028694 | skin and subcutaneous tissue disorders               | 703    | 654   | 207  | 3.16 | 1.66  |
| skin atrophy                | 10040799 | skin and subcutaneous tissue disorders               | 701.9  | 485   | 221  | 2.19 | 1.13  |
| rosacea                     | 10039218 | skin and subcutaneous tissue disorders               | 695.3  | 378   | 178  | 2.12 | 1.09  |
| erythema nodosum            | 10015226 | immune system disorders                              | 695.2  | 707   | 217  | 3.26 | 1.7   |
| application site dermatitis | 10003036 | general disorders and administration site conditions | 692.9  | 377   | 174  | 2.17 | 1.12  |
| bladder disorder            | 10061011 | renal and urinary disorders                          | 596.9  | 1131  | 435  | 2.6  | 1.38  |
| cystitis                    | 10011781 | renal and urinary disorders                          | 595    | 2917  | 682  | 4.28 | 2.1   |
| kidney infection            | 10023424 | renal and urinary disorders                          | 590    | 1416  | 321  | 4.41 | 2.14  |
| inguinal hernia             | 10022016 | gastrointestinal disorders                           | 550.9  | 145   | 490  | 0.3  | -1.76 |
| tongue disorder             | 10043951 | gastrointestinal disorders                           | 529.9  | 1274  | 554  | 2.3  | 1.2   |

|                            |          |                                                                                  |      |      |      |       |
|----------------------------|----------|----------------------------------------------------------------------------------|------|------|------|-------|
| glossitis                  | 10018386 | gastrointestinal disorders                                                       | 1051 | 492  | 2.14 | 1.1   |
| mouth ulceration           | 10028034 | gastrointestinal disorders<br>musculoskeletal and connective<br>tissue disorders | 3487 | 1741 | 2    | 1     |
| jaw disorder               | 10061257 | tissue disorders                                                                 | 1327 | 467  | 2.84 | 1.51  |
| tooth disorder             | 10044034 | gastrointestinal disorders                                                       | 1796 | 669  | 2.68 | 1.42  |
| periodontitis              | 10034539 | gastrointestinal disorders                                                       | 401  | 170  | 2.36 | 1.24  |
| tooth abscess              | 10044016 | gastrointestinal disorders                                                       | 1290 | 555  | 2.32 | 1.22  |
| dental caries              | 10012318 | gastrointestinal disorders<br>respiratory, thoracic and<br>mediastinal disorders | 1474 | 541  | 2.72 | 1.45  |
| laryngitis                 | 10023874 | mediastinal disorders<br>respiratory, thoracic and<br>mediastinal disorders      | 833  | 221  | 3.77 | 1.91  |
| pharyngitis streptococcal  | 10034839 | mediastinal disorders<br>respiratory, thoracic and<br>mediastinal disorders      | 650  | 257  | 2.53 | 1.34  |
| nasopharyngitis            | 10028810 | mediastinal disorders                                                            | 7955 | 3759 | 2.12 | 1.08  |
| injection site haemorrhage | 10022067 | vascular disorders                                                               | 8676 | 1939 | 4.47 | 2.16  |
| oesophageal varices        | 10030210 | gastrointestinal disorders                                                       | 158  | 321  | 0.49 | -1.02 |
| haemorrhage                | 10046996 | vascular disorders                                                               | 472  | 150  | 3.15 | 1.65  |
| varicose vein              | 10014004 | ear and labyrinth disorders                                                      | 409  | 172  | 2.38 | 1.25  |
| ear disorder               | 10015993 | immune system disorders                                                          | 3037 | 1360 | 2.23 | 1.16  |
| eyelid oedema              | 10015995 | eye disorders                                                                    | 1224 | 589  | 2.08 | 1.06  |
| eyelid ptosis              | 10047571 | eye disorders                                                                    | 3918 | 1947 | 2.01 | 1.01  |
| visual impairment          | 10003552 | eye disorders                                                                    | 425  | 171  | 2.49 | 1.31  |
| asthenopia                 | 10000389 | eye disorders                                                                    | 454  | 177  | 2.56 | 1.36  |
| accommodation disorder     | 10005159 | eye disorders                                                                    | 502  | 244  | 2.06 | 1.04  |
| blepharospasm              | 10027951 | psychiatric disorders                                                            | 5101 | 2423 | 2.11 | 1.07  |
| mood swings                | 10033664 | psychiatric disorders                                                            | 5274 | 2312 | 2.28 | 1.19  |
| panic attack               | 10061664 | immune system disorders<br>metabolism and nutrition                              | 557  | 277  | 2.01 | 1.01  |
| autoimmune disorder        | 10047626 | disorders                                                                        | 423  | 126  | 3.36 | 1.75  |
| vitamin d deficiency       |          |                                                                                  |      |      |      |       |
| thyroid disorder           |          |                                                                                  |      |      |      |       |
