# Supplementary material
Source: PubMed Central journal article supplement (PMC4194268)
Supplement: NIHMS619284-supplement-S3.pdf [file NIHMS619284-supplement-S3.pdf]

| Term information                                                                                                                                                             |         | FAERS Results                                                                                                                                                                                                                                                                                        |                                                       |                                                  |                                                | Literatures                                 |                     |                                                |                                                    | Consistent                                                                                |                                            |                                          |                                       |                                                   |                                                     |                     |
|------------------------------------------------------------------------------------------------------------------------------------------------------------------------------|---------|------------------------------------------------------------------------------------------------------------------------------------------------------------------------------------------------------------------------------------------------------------------------------------------------------|-------------------------------------------------------|--------------------------------------------------|------------------------------------------------|---------------------------------------------|---------------------|------------------------------------------------|----------------------------------------------------|-------------------------------------------------------------------------------------------|--------------------------------------------|------------------------------------------|---------------------------------------|---------------------------------------------------|-----------------------------------------------------|---------------------|
| AEs                                                                                                                                                                          | PT code | SOC                                                                                                                                                                                                                                                                                                  | ICD9 code                                             | Num_Cases                                        | Num_Female                                     | Num_Male                                    | Num_Labels          | F/M                                            | logF/M                                             | Num_Cases                                                                                 | Num_Female                                 | Num_Male                                 | F/M                                   | logF/M                                            | Consistent                                          |                     |
| systemic lupus erythematosus cholelithiasis chronic colitis ischaemic herpes simplex hiv infection food allergy ankle fracture dysphonia osteoarthritis rheumatoid arthritis |         | skin and subcutaneous tissue disorders hepatobiliary disorders gastrointestinal disorders and infestations and infestations immune system disorders musculoskeletal and connective tissue disorders nervous system disorders musculoskeletal and connective tissue disorders immune system disorders | 710.0 575.11 557.9 054 042 995.3 824 784.42 715.9 714 | 4127 606 2155 3656 1111 670 2176 7281 4947 10020 | 3147 483 1489 2487 142 435 1696 4706 3410 6828 | 690 100 575 1035 724 207 445 2302 1416 1623 | 1 1 1 1 1 1 1 1 1 1 | 4.56 4.83 2.59 2.4 0.2 2.1 3.81 2.04 2.41 4.21 | 2.19 2.27 1.37 1.26 -2.35 1.07 1.93 1.03 1.27 2.07 | 22882925 20498933 20961178 11930310 19498337 18681854 21190571 12852881 21387001 20155830 | 516 68 364 6978 1440 741 2981 169 1608 582 | 458 50 209 3589 505 355 2487 105 605 427 | 58 18 155 3389 935 386 494 64 166 155 | 7.90 2.78 1.35 1.06 0.54 0.92 5.03 1.64 1.66 2.75 | 2.98 1.47 0.43 0.08 -0.89 -0.12 2.33 0.71 0.73 1.46 | 1 1 1 1 1 0 1 1 1 1 |

|                                                                |          |       |       |       |   |      |      |                |                  |                 |      |      |      |   |
|----------------------------------------------------------------|----------|-------|-------|-------|---|------|------|----------------|------------------|-----------------|------|------|------|---|
| scleroderma                                                    | 10039710 | 768   | 567   | 160   | 1 | 3.54 | 1.83 | 19248123 NA    | 74,4/10 00,000 0 | 13,3/1 00,000 0 | 5.59 | 2.48 | 1    |   |
| urticaria                                                      | 10046735 | 22160 | 14060 | 6838  | 1 | 2.06 | 1.04 | 19002343       | 172              | 142             | 30   | 4.73 | 2.24 | 1 |
| acne                                                           | 10000496 | 3243  | 2282  | 812   | 1 | 2.81 | 1.49 | 21611685       | 781              | 591             | 190  | 3.11 | 1.64 | 1 |
| alopecia cutaneous lupus erythematosus urinary tract infection | 10001760 | 23710 | 18980 | 3465  | 1 | 5.48 | 2.45 | 14043621       | 736              | 412             | 324  | 1.27 | 0.35 | 1 |
| pyelonephritis                                                 | 10056509 | 559   | 399   | 109   | 1 | 3.66 | 1.87 | 19289752       | 156              | 100             | 56   | 1.79 | 0.84 | 1 |
| coeliac disease                                                | 10046571 | 16870 | 12340 | 4034  | 1 | 3.06 | 1.61 | 17431694       | 350              | 219             | 131  | 1.67 | 0.74 | 1 |
| autoimmune hepatitis                                           | 10037596 | 1307  | 922   | 338   | 1 | 2.73 | 1.45 | 21784477 ##### | 33336            | 12964           | 2.57 | 1.36 | 1    |   |
| irritable bowel syndrome                                       | 10009839 | 1081  | 782   | 254   | 1 | 3.08 | 1.62 | 19183153       | 600              | 450             | 150  | 3.00 | 1.58 | 1 |
| constipation                                                   | 10003827 | 1403  | 997   | 322   | 1 | 3.1  | 1.63 | 18925307       | 183              | 141             | 42   | 3.36 | 1.75 | 1 |
| dyspepsia                                                      | 10023003 | 2446  | 1814  | 576   | 1 | 3.15 | 1.66 | 15113370       | 1245             | 684             | 561  | 1.22 | 0.29 | 1 |
|                                                                | 10010774 | 35780 | 22880 | 11220 | 1 | 2.04 | 1.03 | 17919271       | 5507             | 3665            | 1842 | 1.99 | 0.99 | 1 |
|                                                                | 10013946 | 20600 | 13330 | 6607  | 1 | 2.02 | 1.01 | 17728288       | 6913             | 3667            | 3246 | 1.13 | 0.18 | 1 |



|                                  |          |                                                                     |        |      |      |      |   |      |       |          |      |      |      |      |       |   |
|----------------------------------|----------|---------------------------------------------------------------------|--------|------|------|------|---|------|-------|----------|------|------|------|------|-------|---|
| intracranial aneurysm            | 10022758 | nervous system disorders                                            | 442.9  | 792  | 570  | 198  | 1 | 2.88 | 1.53  | 18496941 | 99   | 74   | 25   | 2.96 | 1.57  | 1 |
| pulmonary thrombosis             | 10037437 | vascular disorders                                                  | 415.1  | 1159 | 771  | 362  | 1 | 2.13 | 1.09  | 22449293 | 4832 | 2279 | 2553 | 0.89 | -0.16 | 0 |
| hyperacusis                      | 10020559 | nervous system disorders                                            | 388.42 | 935  | 646  | 271  | 1 | 2.38 | 1.25  | 12477175 | 584  | 321  | 263  | 1.22 | 0.29  | 1 |
| optic ischaemic neuropathy       | 10030924 | eye disorders                                                       | 377.41 | 1111 | 251  | 808  | 1 | 0.31 | -1.69 | 11704063 | 80   | 25   | 55   | 0.45 | -1.14 | 1 |
| optic neuritis                   | 10030942 | nervous system disorders and skin and subcutaneous tissue disorders | 377.3  | 1694 | 1172 | 447  | 1 | 2.62 | 1.39  | 20437939 | 218  | 156  | 62   | 2.52 | 1.33  | 1 |
| blepharitis                      | 10005148 | eye disorders                                                       | 373    | 522  | 342  | 151  | 1 | 2.26 | 1.18  | 16033750 | 170  | 79   | 91   | 0.87 | -0.20 | 0 |
| cataract                         | 10007739 | eye disorders                                                       | 366    | 5899 | 3857 | 1839 | 1 | 2.1  | 1.07  | 22193877 | 6804 | 3838 | 2966 | 1.29 | 0.37  | 1 |
| carpal tunnel syndrome           | 10007697 | nervous system disorders                                            | 354    | 2312 | 1614 | 628  | 1 | 2.57 | 1.36  | 21606100 |      | 428  | 182  | 2.35 | 1.23  | 1 |
| trigeminal neuralgia             | 10044652 | nervous system disorders                                            | 350.1  | 691  | 534  | 141  | 1 | 3.79 | 1.92  | 21294091 | 3370 | 2097 | 1273 | 1.65 | 0.72  | 1 |
| benign intracranial hypertension | 10004277 | nervous system disorders                                            | 348.2  | 943  | 630  | 244  | 1 | 2.58 | 1.37  | 20804521 | 6041 | 5194 | 847  | 6.13 | 2.62  | 1 |
| migraine                         | 10027599 | vascular disorders                                                  | 346    | 9126 | 7246 | 1535 | 1 | 4.72 | 2.24  | 18644028 | 00   | 00   | 00   | 2.94 | 1.56  | 1 |
| multiple sclerosis               | 10028245 | nervous system disorders                                            | 340    | 7997 | 6038 | 1849 | 1 | 3.27 | 1.71  | 14638958 | 218  | 151  | 67   | 2.25 | 1.17  | 1 |

|                                   |          |                                                                                                                 |        |      |      |     |   |      |       |          |      |      |     |      |       |   |
|-----------------------------------|----------|-----------------------------------------------------------------------------------------------------------------|--------|------|------|-----|---|------|-------|----------|------|------|-----|------|-------|---|
| restless<br>legs<br>syndrome      | 10058920 | musculoskeletal and<br>connective<br>tissue<br>disorders                                                        | 333.94 | 2467 | 1654 | 669 | 1 | 2.47 | 1.31  | 21705273 | 295  | 196  | 99  | 1.98 | 0.99  | 1 |
| bruxism<br>conversion<br>disorder | 10006514 | gastrointestinal disorders<br>psychiatric<br>disorders                                                          | 306.8  | 1067 | 710  | 305 | 1 | 2.33 | 1.22  | 20936432 | 170  | 88   | 82  | 1.07 | 0.10  | 1 |
| iron<br>deficiency<br>anaemia     | 10010893 | disorders<br>blood and<br>lymphatic<br>system                                                                   | 300.11 | 996  | 742  | 235 | 1 | 3.16 | 1.66  | 2257985  | 84   | 57   | 27  | 2.11 | 1.08  | 1 |
| gout                              | 10022972 | disorders<br>metabolism<br>and nutrition                                                                        | 280.9  | 1972 | 1297 | 627 | 1 | 2.07 | 1.05  | 15254305 | 431  | 277  | 154 | 1.80 | 0.85  | 1 |
| meningioma                        | 10018498 | disorders<br>neoplasms<br>benign,<br>malignant<br>and<br>unspecified<br>(incl cysts<br>and polyps)              | 240.9  | 1082 | 820  | 233 | 1 | 3.52 | 1.82  | 21357288 | 741  | 641  | 100 | 6.41 | 2.68  | 1 |
| thyroid<br>cancer                 | 10027191 | endocrine<br>disorders<br>neoplasms<br>benign,<br>malignant<br>and<br>unspecified<br>(incl cysts<br>and polyps) | 225.2  | 696  | 519  | 150 | 1 | 3.46 | 1.79  | 20821343 | 381  | 293  | 88  | 3.33 | 1.74  | 1 |
| bladder<br>cancer                 | 10066474 | disorders<br>neoplasms<br>benign,<br>malignant<br>and<br>unspecified<br>(incl cysts<br>and polyps)              | 193    | 676  | 488  | 152 | 1 | 3.21 | 1.68  | 18972595 | 2747 | 2283 | 464 | 4.92 | 2.30  | 1 |
| sarcoidosis                       | 10005003 | immune<br>system<br>disorders                                                                                   | 188.9  | 1015 | 306  | 652 | 1 | 0.47 | -1.09 | 1910881  | 1239 | 363  | 876 | 0.41 | -1.27 | 1 |
|                                   | 10039486 | disorders                                                                                                       | 135    | 802  | 503  | 244 | 1 | 2.06 | 1.04  | 19445421 | 248  | 146  | 102 | 1.43 | 0.52  | 1 |
