# Supplementary material
Source: PubMed Central journal article supplement (PMC4194268)
Supplement: NIHMS619284-supplement-S4.pdf [file NIHMS619284-supplement-S4.pdf]

| Disease Names                | MarshField Clinical |             |             | FAERS              |               |             | Literatures |               |             |             |           |
|------------------------------|---------------------|-------------|-------------|--------------------|---------------|-------------|-------------|---------------|-------------|-------------|-----------|
|                              | No. of Female       | No. of Male | Ratio (F/M) | chi square p value | No. of Female | No. of Male | Ratio (F/M) | No. of Female | No. of Male | Ratio (F/M) | PubMed ID |
| Acne                         | 188                 | 203         | 0.93        | 0.01551            | 2282          | 812         | 2.81        | 591           | 190         | 3.11        | 21611685  |
| Alopecia                     | 732                 | 358         | 2.04        | <2.2e-16           | 18980         | 3465        | 5.48        | 412           | 324         | 1.27        | 14043621  |
| Autoimmune Hepatitis         | 123                 | 39          | 3.15        | 5.175E-08          | 997           | 322         | 3.10        | 141           | 42          | 3.36        | 18925307  |
| Meningioma                   | 643                 | 223         | 2.88        | <2.2e-16           | 519           | 150         | 3.46        | 293           | 88          | 3.33        | 20821343  |
| Optic Ischaemic Neuropathy   | 176                 | 215         | 0.82        | 0.0002742          | 251           | 808         | 0.31        | 25            | 55          | 0.45        | 11704063  |
| Rheumatoid Arthritis         | 3372                | 1508        | 2.24        | <2.2e-16           | 6828          | 1623        | 4.21        | 427           | 155         | 2.75        | 20155830  |
| Systemic Lupus Erythematosus | 639                 | 108         | 5.92        | <2.2e-16           | 3147          | 690         | 4.56        | 458           | 58          | 7.90        | 22882925  |
| Trigeminal Neuralgia         | 812                 | 405         | 2.00        | <2.2e-16           | 534           | 141         | 3.79        | 2097          | 1273        | 1.65        | 21294091  |
| <b>total female</b>          | 2258039             |             |             |                    |               |             |             |               |             |             |           |
| <b>total male</b>            | 1899918             |             |             |                    |               |             |             |               |             |             |           |
